# Supplementary material for: Analysis of deformation bands associated with the Trachyte Mesa intrusion, Henry Mountains, Utah: implications for reservoir connectivity and fluid flow around sill intrusions
Source: Copernicus journal article supplement (doi:10.5194/se-12-95-2021), 2021-01-20

### Deformation Band Topology data.

| Station | Scan Size |      |       |        | Nodes |     |     |     | Percentage of Nodes |      |      | Line /Branch Topology |       |        |         |          |      |      |      |      |       |      |      |
|---------|-----------|------|-------|--------|-------|-----|-----|-----|---------------------|------|------|-----------------------|-------|--------|---------|----------|------|------|------|------|-------|------|------|
|         | diameter  | Area | SL    | P21    | I     | Y   | X   | N   | P(I)                | P(Y) | P(X) | B                     | L     | P(x+y) | P20     | B20      | <L>  | <B>  | CI   | Cb   | P22   | B22  | <D>  |
|         | m         | m2   | m     | m-1    |       |     |     |     | %                   | %    | %    |                       |       |        |         |          |      |      |      |      |       |      |      |
| TMFS_1  | 1.0       | 0.79 | 5.85  | 7.45   | 11    | 9   | 4   | 24  | 0.46                | 0.38 | 0.17 | 27                    | 10    | 0.54   | 12.73   | 34.38    | 0.59 | 0.22 | 2.60 | 1.59 | 4.36  | 1.61 | 2.25 |
| TMFS_1  | 0.5       | 0.20 | 1.91  | 9.73   | 3     | 1   | 3   | 7   | 0.43                | 0.14 | 0.43 | 9                     | 2     | 0.57   | 10.19   | 45.84    | 0.96 | 0.21 | 4.00 | 1.67 | 9.29  | 2.06 | 2.57 |
| TMFS_1  | 0.2       | 0.03 | 0.49  | 15.60  | 0     | 0   | 1   | 1   | 0.00                | 0.00 | 1.00 | 2                     | 0     | 1.00   | 0.00    | 63.66    |      | 0.25 |      | 2.00 |       | 3.82 | 4.00 |
| TMFS_1  | 0.2       | 0.03 | 0.74  | 23.55  | 4     | 5   | 1   | 10  | 0.40                | 0.50 | 0.10 | 11.5                  | 4.5   | 0.60   | 143.24  | 366.06   | 0.16 | 0.06 | 2.67 | 1.65 | 3.87  | 1.52 | 2.30 |
| TMFS_1  | 0.2       | 0.03 | 0.00  | 0.00   | 0     | 0   | 0   | 0   |                     |      |      | 0                     | 0     |        | 0.00    | 0.00     |      |      |      |      |       |      |      |
| TMFS_1  | 0.3       | 0.07 | 2.24  | 31.69  | 3     | 18  | 8   | 29  | 0.10                | 0.62 | 0.28 | 44.5                  | 10.5  | 0.90   | 148.54  | 629.55   | 0.21 | 0.05 | 4.95 | 1.93 | 6.76  | 1.60 | 3.07 |
| TMFS_2  | 1.0       | 0.79 | 1.96  | 2.50   | 2     | 1   | 0   | 3   | 0.67                | 0.33 | 0.00 | 2.5                   | 1.5   | 0.33   | 1.91    | 3.18     | 1.31 | 0.78 | 1.33 | 1.20 | 3.26  | 1.96 | 1.67 |
| TMFS_2  | 0.2       | 0.03 | 0.59  | 18.78  | 0     | 1   | 0   | 1   | 0.00                | 1.00 | 0.00 | 1.5                   | 0.5   | 1.00   | 15.92   | 47.75    | 1.17 | 0.39 | 4.00 | 2.00 | 21.86 | 7.29 | 3.00 |
| TMFS_2  | 0.2       | 0.03 | 0.20  | 6.37   | 0     | 0   | 0   | 0   |                     |      |      | 0                     | 0     |        | 0.00    | 0.00     |      |      |      |      |       |      |      |
| TMFS_2  | 0.2       | 0.03 | 0.20  | 6.37   | 0     | 0   | 0   | 0   |                     |      |      | 0                     | 0     |        | 0.00    | 0.00     |      |      |      |      |       |      |      |
| TMFS_2  | 0.2       | 0.03 | 0.00  | 0.00   | 0     | 0   | 0   | 0   |                     |      |      | 0                     | 0     |        | 0.00    | 0.00     |      |      |      |      |       |      |      |
| TMFS_2  | 0.2       | 0.03 | 0.34  | 10.82  | 2     | 0   | 0   | 2   | 1.00                | 0.00 | 0.00 | 1                     | 1     | 0.00   | 31.83   | 31.83    | 0.34 | 0.34 | 0.00 | 0.00 | 3.62  | 3.62 | 1.00 |
| TMFS_2  | 0.2       | 0.03 | 0.39  | 12.41  | 0     | 1   | 0   | 1   | 0.00                | 1.00 | 0.00 | 1.5                   | 0.5   | 1.00   | 15.92   | 47.75    | 0.78 | 0.26 | 4.00 | 2.00 | 9.63  | 3.21 | 3.00 |
| TMFS_3  | 0.5       | 0.20 | 3.46  | 17.62  | 5     | 32  | 19  | 56  | 0.09                | 0.57 | 0.34 | 88.5                  | 18.5  | 0.91   | 94.22   | 450.73   | 0.19 | 0.04 | 5.51 | 1.94 | 3.30  | 0.69 | 3.16 |
| TMFS_3  | 0.5       | 0.20 | 2.47  | 12.58  | 8     | 7   | 0   | 15  | 0.53                | 0.47 | 0.00 | 14.5                  | 7.5   | 0.47   | 38.20   | 73.85    | 0.33 | 0.17 | 1.87 | 1.45 | 4.13  | 2.13 | 1.93 |
| TMFS_3  | 0.5       | 0.20 | 2.94  | 14.97  | 9     | 20  | 4   | 33  | 0.27                | 0.61 | 0.12 | 42.5                  | 14.5  | 0.73   | 73.85   | 216.45   | 0.20 | 0.07 | 3.31 | 1.79 | 3.04  | 1.04 | 2.58 |
| TMFS_3  | 0.2       | 0.03 | 1.38  | 43.93  | 3     | 21  | 17  | 41  | 0.07                | 0.51 | 0.41 | 67                    | 12    | 0.93   | 381.97  | 2132.68  | 0.11 | 0.02 | 6.33 | 1.96 | 5.03  | 0.90 | 3.27 |
| TMFS_3  | 0.2       | 0.03 | 0.64  | 20.37  | 2     | 1   | 0   | 3   | 0.67                | 0.33 | 0.00 | 2.5                   | 1.5   | 0.33   | 47.75   | 79.58    | 0.43 | 0.26 | 1.33 | 1.20 | 8.66  | 5.20 | 1.67 |
| TMFS_3  | 0.2       | 0.03 | 0.55  | 17.51  | 1     | 3   | 0   | 4   | 0.25                | 0.75 | 0.00 | 5                     | 2     | 0.75   | 63.66   | 159.15   | 0.28 | 0.11 | 3.00 | 1.80 | 4.85  | 1.94 | 2.50 |
| TMFS_3  | 0.2       | 0.03 | 0.00  | 0.00   | 0     | 0   | 0   | 0   |                     |      |      | 0                     | 0     |        | 0.00    | 0.00     |      |      |      |      |       |      |      |
| TMFS_3  | 1.0       | 0.79 | 8.67  | 11.04  | 15    | 44  | 22  | 81  | 0.19                | 0.54 | 0.27 | 117.5                 | 29.5  | 0.81   | 37.56   | 149.61   | 0.29 | 0.07 | 4.47 | 1.87 | 3.24  | 0.81 | 2.90 |
| TMFS_4  | 0.5       | 0.20 | 5.79  | 29.49  | 15    | 56  | 13  | 84  | 0.18                | 0.67 | 0.15 | 117.5                 | 35.5  | 0.82   | 180.80  | 598.42   | 0.16 | 0.05 | 3.89 | 1.87 | 4.74  | 1.43 | 2.80 |
| TMFS_4  | 0.5       | 0.20 | 4.19  | 21.34  | 22    | 25  | 6   | 53  | 0.42                | 0.47 | 0.11 | 60.5                  | 23.5  | 0.58   | 119.68  | 308.12   | 0.18 | 0.07 | 2.64 | 1.64 | 3.80  | 1.48 | 2.28 |
| TMFS_4  | 0.2       | 0.03 | 0.90  | 28.65  | 2     | 10  | 2   | 14  | 0.14                | 0.71 | 0.14 | 20                    | 6     | 0.86   | 190.99  | 636.62   | 0.15 | 0.05 | 4.00 | 1.90 | 4.30  | 1.29 | 2.86 |
| TMFS_4  | 0.2       | 0.03 | 1.33  | 42.34  | 11    | 2   | 0   | 13  | 0.85                | 0.15 | 0.00 | 8.5                   | 6.5   | 0.15   | 206.90  | 270.56   | 0.20 | 0.16 | 0.62 | 0.71 | 8.66  | 6.62 | 1.31 |
| TMFS_5  | 1.0       | 0.79 | 32.60 | 41.51  | 97    | 372 | 177 | 646 | 0.15                | 0.58 | 0.27 | 960.5                 | 234.5 | 0.85   | 298.57  | 1222.95  | 0.14 | 0.03 | 4.67 | 1.90 | 5.77  | 1.41 | 2.97 |
| TMFS_5  | 0.2       | 0.03 | 4.10  | 130.51 | 0     | 143 | 39  | 182 | 0.00                | 0.79 | 0.21 | 292.5                 | 71.5  | 1.00   | 2275.92 | 9310.56  | 0.06 | 0.01 | 5.09 | 2.00 | 7.48  | 1.83 | 3.21 |
| TMFS_5  | 0.2       | 0.03 | 1.15  | 36.61  | 5     | 13  | 1   | 19  | 0.26                | 0.68 | 0.05 | 24                    | 9     | 0.74   | 286.48  | 763.94   | 0.00 | 0.00 |      |      |       |      | 2.53 |
| TMFS_5  | 0.2       | 0.03 | 4.92  | 156.61 | 2     | 169 | 67  | 238 | 0.01                | 0.71 | 0.28 | 388.5                 | 85.5  | 0.99   | 2721.55 | 12366.34 | 0.06 | 0.01 | 5.52 | 1.99 | 9.01  | 1.98 | 3.26 |
| TMFS_6  | 0.2       | 0.03 | 4.42  | 140.69 | 1     | 169 | 41  | 211 | 0.00                | 0.80 | 0.19 | 336                   | 85    | 1.00   | 2705.63 | 10695.21 | 0.05 | 0.01 | 4.94 | 2.00 | 7.32  | 1.85 | 3.18 |
| TMFS_6  | 0.2       | 0.03 | 3.78  | 120.32 | 1     | 114 | 37  | 152 | 0.01                | 0.75 | 0.24 | 245.5                 | 57.5  | 0.99   | 1830.28 | 7814.51  | 0.07 | 0.02 | 5.25 | 2.00 | 7.91  | 1.85 | 3.23 |
| TMFS_6  | 0.5       | 0.20 | 12.76 | 64.99  | 0     | 152 | 36  | 188 | 0.00                | 0.81 | 0.19 | 300                   | 76    | 1.00   | 387.06  | 1527.89  | 0.17 | 0.04 | 4.95 | 2.00 | 10.91 | 2.76 | 3.19 |

SL - Total Length; P21 - Intensity; [B] - Number of Branches; [L] - Number of Lines; P(x+y) - Proportion X+Y; P20 - Line Frequency; B20 - Branch Frequency; <L> - Characteristic Line Length; <B> Characteristic Branch Length; CI - Connections per Line; Cb - Connections per Branch; P22 - Line Dimensionless Intensity; B22 - Branch Dimensionless Intensity; <d> Average Degree.

Porosity data

Host Rock Porosity

| Station | Sample | Scans |      |      |      |      | Average Host Porosity |
|---------|--------|-------|------|------|------|------|-----------------------|
|         |        | 1     | 2    | 3    | 4    | 5    |                       |
| 1       | TMFS_1 | 9.4   | 13.8 | 11.1 |      |      | 11.4                  |
| 2       | TMFS_2 | 12.0  | 13.4 | 2.3  | 14.2 | 14.0 | 11.2                  |
| 3       | TMFS_3 | 23.4  | 19.4 | 13.3 |      |      | 18.7                  |
| 4       | TMFS_4 | 18.1  | 12.9 | 14.9 | 11.7 |      | 14.4                  |
| 5       | TMFS_5 | 9.1   | 7.4  | 4.4  |      |      | 7.0                   |
| 6       | TMFS_6 | 3.2   | 4.7  | 9.2  | 6.6  | 6.8  | 6.1                   |

Deformation Band Porosity

| Station | Sample | Scans |     |     |     |   | Average DB Porosity |
|---------|--------|-------|-----|-----|-----|---|---------------------|
|         |        | 1     | 2   | 3   | 4   | 5 |                     |
| 1       | TMFS_1 |       |     |     |     |   |                     |
| 2       | TMFS_2 |       |     |     |     |   |                     |
| 3       | TMFS_3 | 2.8   |     |     |     |   | 2.8                 |
| 4       | TMFS_4 | 2.1   | 1.7 |     |     |   | 1.9                 |
| 5       | TMFS_5 | 1.1   | 1.1 |     |     |   | 1.1                 |
| 6       | TMFS_6 | 1.7   | 1.1 | 1.6 | 1.4 |   | 1.5                 |

All Measurements

| Station | Type | Porosity (%) |
|---------|------|--------------|
| 1       | Host | 9.4          |
| 1       | Host | 13.8         |
| 1       | Host | 11.1         |
| 2       | Host | 12.0         |
| 2       | Host | 13.4         |
| 2       | Host | 2.3          |
| 2       | Host | 14.2         |
| 3       | Host | 23.4         |
| 3       | Host | 19.4         |
| 3       | Host | 13.3         |
| 3       | DB   | 2.8          |
| 4       | Host | 18.1         |
| 4       | Host | 12.9         |
| 4       | Host | 14.9         |
| 4       | Host | 11.7         |
| 4       | DB   | 2.1          |
| 4       | DB   | 1.7          |
| 4       | DB   | 2.0          |
| 5       | Host | 9.1          |
| 5       | Host | 7.4          |
| 5       | Host | 4.4          |
| 5       | DB   | 1.1          |
| 5       | DB   | 1.1          |
| 6       | Host | 6.8          |
| 6       | Host | 6.6          |
| 6       | Host | 9.2          |
| 6       | Host | 4.7          |
| 6       | Host | 3.2          |
| 6       | DB   | 1.4          |
| 6       | DB   | 1.7          |
| 6       | DB   | 1.1          |
| 6       | DB   | 1.6          |

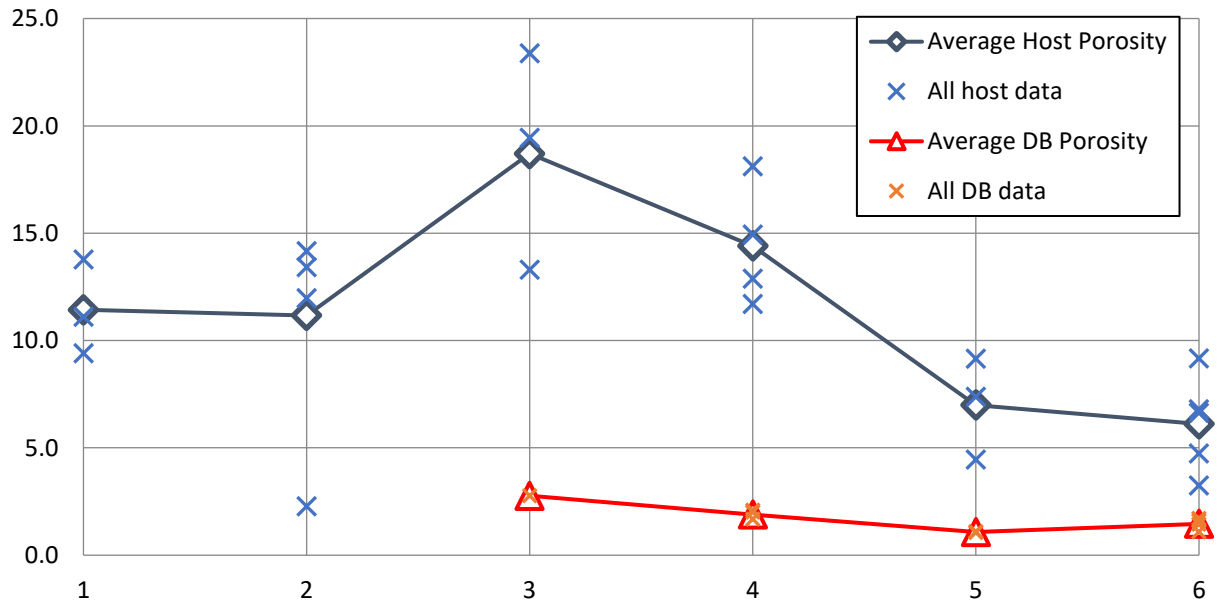

Supplement: Supplementary file 2 [file se-12-95-2021-supplement.zip]
