# Supplementary material for: Analysis of deformation bands associated with the Trachyte Mesa intrusion, Henry Mountains, Utah: implications for reservoir connectivity and fluid flow around sill intrusions
Source: Copernicus journal article supplement (doi:10.5194/se-12-95-2021), 2021-01-20
Supplement: Supplementary file 1 [file se-12-95-2021-supplement.zip]

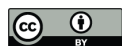

## *Supplement of*

# **Analysis of deformation bands associated with the Trachyte Mesa intrusion, Henry Mountains, Utah: implications for reservoir connectivity and fluid flow around sill intrusions**

**Penelope I. R. Wilson et al.**

*Correspondence to:* Penelope I. R. Wilson ([p.wilson@kingston.ac.uk](mailto:p.wilson@kingston.ac.uk))

- [se-12-95-2021-supplement-title-page.pdf](#)
- [Appendices\\_TMFS\\_1\\_OutcropStudy.png](#)
- [Appendices\\_TMFS\\_2\\_OutcropStudy.png](#)
- [Appendices\\_TMFS\\_3\\_OutcropStudy.png](#)
- [Appendices\\_TMFS\\_4\\_OutcropStudy\\_cropped.png](#)
- [Appendices\\_TMFS\\_5\\_OutcropStudy\\_v2\\_cropped.png](#)
- [Appendices\\_TMFS\\_6\\_OutcropStudy.png](#)
- [TMFS\\_Supplement\\_Tables.pdf](#)

The copyright of individual parts of the supplement might differ from the CC BY 4.0 License.
